# Supplementary material for: Decrease in All-Cause 30-Day Mortality after Bacteraemia over a 15-Year Period: A Population-Based Cohort Study in Denmark in 2000–2014
Source: MDPI journal article supplement (doi:10.3390/ijerph18115982), 2021-06-02
Supplement: s1 [file s1]

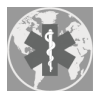

## Supplementary Materials

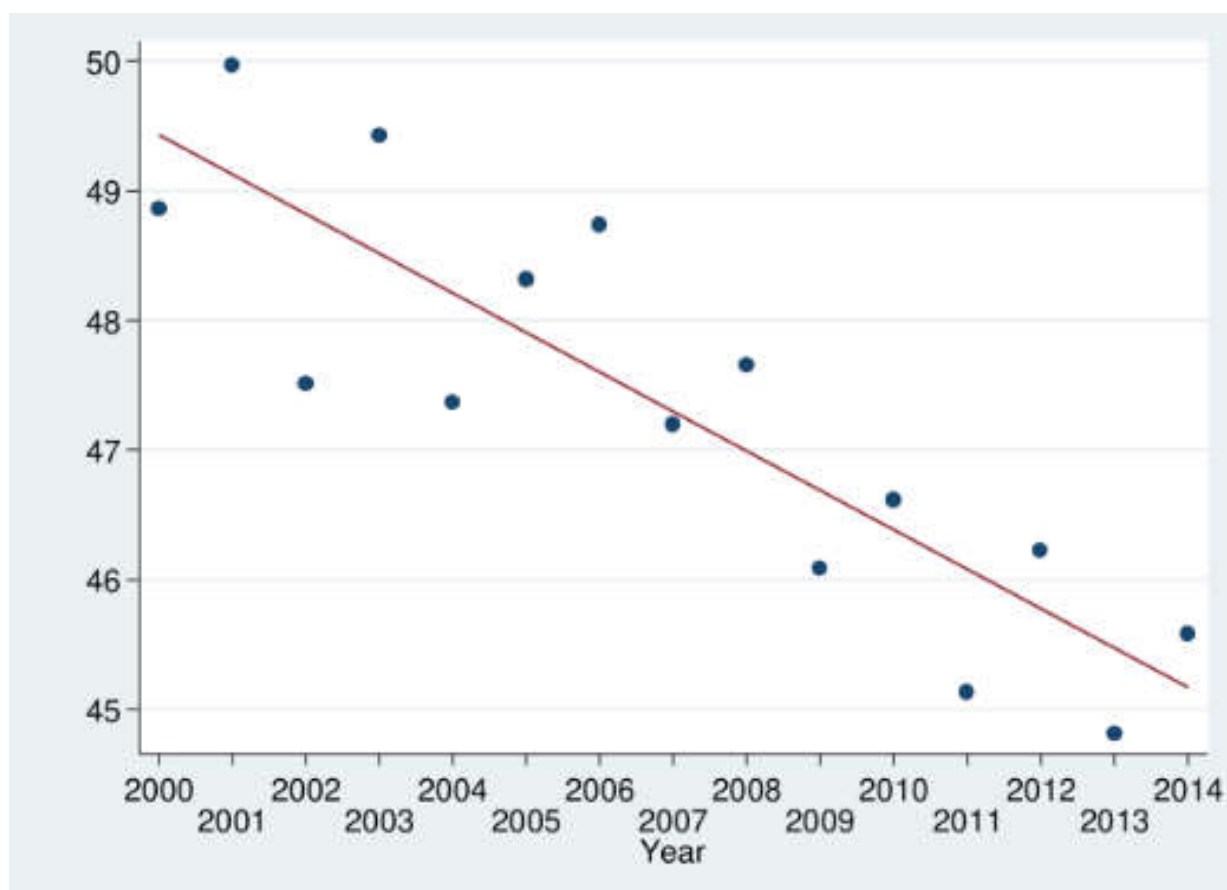

**Figure S1.** % females among first-time bacteraemia episodes, by year, with a trend line.

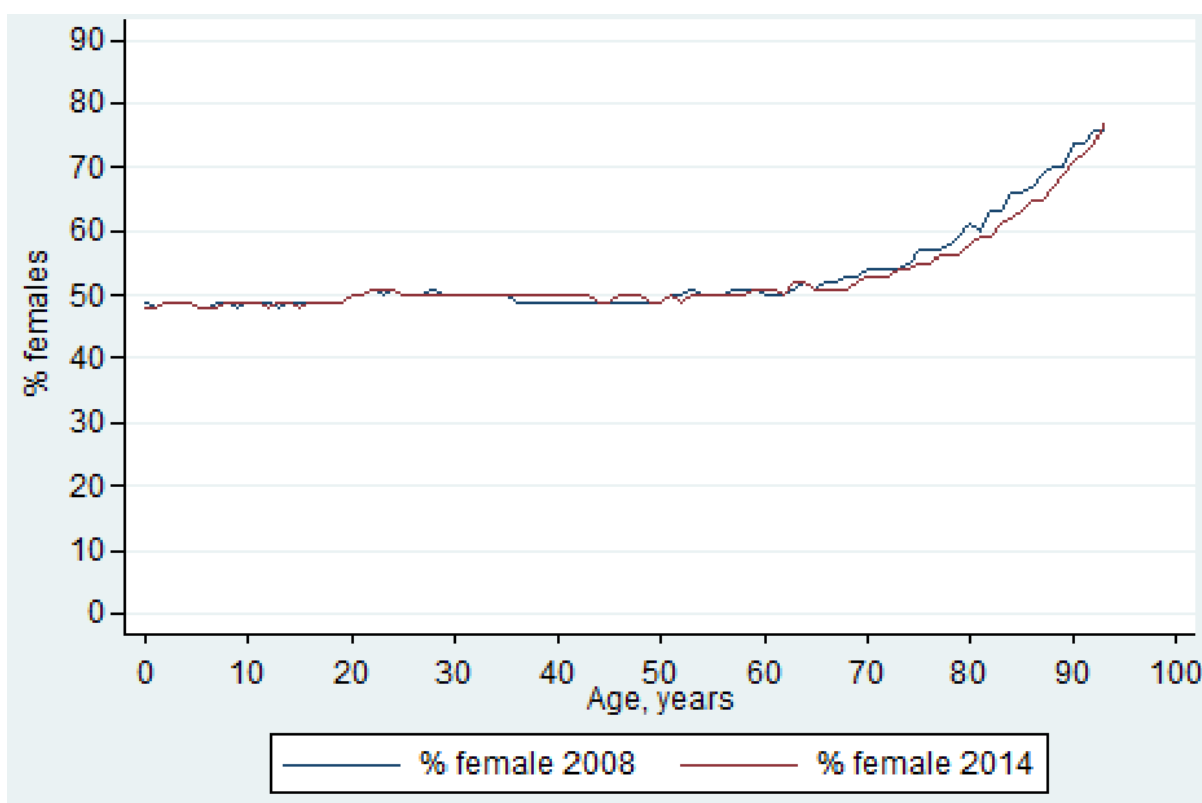

Figure S2. Female sex distribution in background population.
